# Supplementary material
Source: publisher site journal article supplement (https://www.dovepress.com/article/164285)
Supplement: Supplementary file 1 [file get_supplementary_file.php]

**ONLINE SUPPLEMENT OF ADDITIONAL METHODS AND RESULTS**

**Feasibility and challenges of using multiple breath washout**

**in COPD**

Alan Bell1,2, Philip Lawrence1, Dave Singh1,2,4, Alexander Horsley2,3,4

1: The Medicines Evaluation Unit, Centre for Respiratory Medicine and Allergy, University Hospital of South Manchester, University of Manchester, Manchester, M23 9QZ

2: Division of Infection Immunity & Respiratory Medicine, Faculty of Biology Medicine and Health, University of Manchester, Manchester M23 9LT

3: Manchester Adult Cystic Fibrosis Centre, Manchester University NHS Foundation Trust, Manchester M23 9LT

4: Manchester Academic Health Science Centre

Corresponding Author: Alex Horsley (alexander.horsley@manchester.ac.uk)

# Additional Methods

The order of assessments was as follows:impulse oscillometry, multiple breath washout, gas transfer, plethysmography, spirometry and 6 minute walk test.

### Multiple-Breath Nitrogen Washout (MBWN2)

MBWN2 was performed as previously described by Jensen et al using an open circuit, bias flow system (ExhalyzerD**®**, EcoMedics AG, and Duernten, Switzerland) and associated software (SpirowareH 3.1 EcoMedics AG)(1). The ExhalyzerD**®** (EcoMedics AG, and Duernten, Switzerland) uses an ultrasonic flow sensor (Spiroson1, ndd Medical Technologies, Zurich, Switzerland). The method does not require a wash-in phase and the switch from room air to O2 was automated. Subjects breathed at a steady VT whilst wearing a nose-clip in a seated position. Once the O2 circuit was engaged subjects continued the same breathing pattern until the concentration of N2 reached at least 1/40th of the original concentration for three consecutive breaths. The subjects were allowed to re-equilibrate in room air between tests with a rest time of 1.5 times the duration of the previous washout. All tests were continuously inspected for quality. A test was rejected if N2 spikes were apparent due to cough or leak at the mouth. The reproducibility of FRCN2 and LCIN2 required 3 tests which did not vary by >10% and the mean value reported. Z-scores for LCIN2 were taken from those provided by the Ecomedics software and have been used for comparison with FEV1 Z-scores. The dataset used to derive these normal ranges consists of 700 controls (age 7-70yrs) (personal communication with manufacturers, 2018), and is in widespread clinical use. Other analyses have been presented using the raw LCI figures to allow comparison with other MBW systems. The outcomes however are the same, regardless of whether Z-scores or raw data were analysed, since the Z-scores showed strong correlation with the raw LCI figures over the narrow age range of the study population (r=0.95, p<0.00001).

### Sulphur-Hexafluoride MBW (MBWSF6)

SF6 multiple breath washout was performed as previously described, using a modified InnocorTM gas analyser (Innovision, Odense, Denmark) and 0.2% sulfur hexafluoride (SF6) as the tracer gas(2). Washout tests were performed with the subject seated and suitably distracted by watching TV. A nose clip was applied and tidal breathing established whilst the subject breathed through a mouthpiece and filter. During wash-in, subjects inspired 0.2% SF6 in air from a detachable flow-past circuit connected to the end of the flowmeter. Wash-in gas was supplied from a compressed gas cylinder (BOC, Guildford, UK), with the gas flow rate adjusted to ensure that rebreathing did not occur. The wash-in phase continued until inspiratory and expiratory SF6 concentrations differed by <0.004% (absolute difference in SF6 concentration). Once the wash-in phase was complete the washout phase was initiated by detaching the flow past circuit during expiration by manually removing the connecting T-piece from the flow meter. The subject was warned that this was going to happen beforehand, and the process was demonstrated to the subject before the start of the test to familiarise them with the manoeuvre. Prior to the removal of the T-piece, a stream of air was directed over the end of the flow meter using a fan, to ensure that expired SF6 was not re-inspired. The subject now breathing room air, continued at VT until the end tidal SF6 concentration had fallen to less than 0.005% (1/40th of the SF6 concentration during wash-in) for at least three consecutive breaths. No interval was required between tests, though patients were allowed a break of up to 5 minutes if requested. Data were analysed offline after washout testing using the SimpleWashout analysis package described by Hannon, et al.(3).

Nitrogen and SF6 washouts were performed in a random order.

Impulse Oscillometry (IOS)

The impedance of the total respiratory system (Zrs) was measured using a Masterscreen impulse oscillometer (IOS; Erich Jaeger, Hoechenberg, Germany), calibrated daily before subject use with corrections for ambient temperature, barometric pressure and relative humidity. The pneumotachograph was calibrated using a 3L syringe and reference impedance with a known resistance was used to check pressure and frequency measurements. The test involves the delivery of multiple frequency waveforms to the airway using a loudspeaker that allows flow to be generated from the different pressure oscillations. Subjects were seated in a relaxed upright position, wearing a nose-clip, supporting their cheeks to reduce upper airway shunting. Impulses were applied at 0.2-second intervals during tidal breathing for at least 30 seconds. A frequency range of 5 to 35 Hz was used to determine the components of respiratory system impedance (Zrs): respiratory system resistance (Rrs) and respiratory system reactance (Xrs). Frequency measurements outside of this range suffer from reduced signal quality at low frequencies (<5 Hz) using current technology. Wave propagation becomes dependent on physiological size and compliance of the airways at high frequencies (>100 Hz)(4). Analysed measurements consisted of total respiratory system resistance (R5), proximal respiratory system resistance (R20) and respiratory system reactance of the lung periphery (X5). The reduction in resistance from R5 to R20 was used as a surrogate marker of peripheral airway resistance. For measurements of Rrs and Xrs the mean value from 3 measurements were reported. Each of the 3 measurements did not vary greater than 10% from the mean value. Coherence (ϒ2) was monitored after each attempt to determine signal quality. ϒ2 was deemed acceptable when > 0.6 Hz for frequencies > 5 Hz and > 0.9 for frequencies > 20 Hz(5).

Spirometry

The Sensormedics Vmax spirometer (Sensormedics Corporation, Yorba Linda CA, USA) was calibrated daily using a 3L syringe after corrections for ambient temperature, barometric pressure and relative humidity. Spirometry was performed according to the American Thoracic Society/European Respiratory Society guidelines(6) that required subjects to forcibly inhale to total lung capacity (TLC) then immediately exhale to residual volume. The tests were performed in triplicate with the subjects in a seated position while wearing a nose-clip. Reference values used were those of the 2012 Global Lung Initiative (GLI)(7). Airflow obstruction was defined by FEV1/FVC<0.7 and severity classified by post bronchodilator FEV1 % predicted according to the GOLD 2017 recommendations(8).

### Whole-Body Plethysmography

The constant volume whole body plethysmograph (Autobox 6200 DL, Sensormedics, Yorba Linda CA, USA) was calibrated daily prior to use after corrections for ambient temperature, barometric pressure and relative humidity. The mass flow sensor was calibrated using a 3L syringe and a pressure and leak calibration performed on the Autobox.

Subjects sat inside the plethysmograph wearing a nose clip and formed a tight seal around the rubber mouthpiece while supporting their cheeks. Measurement commenced with breathing at tidal volume (VT) until baseline FRC was established. Subjects then performed a series of ‘shallow breathing’ manoeuvres at a rate of approximately 1 Hz to assess specific airways resistance (sRaw)(9). After at least three flow/box pressure loops were obtained, the shutter was then closed and at least three mouth pressure/box pressure loops were recorded to determine thoracic gas volume (TGV). At this point in the test the software performs multiple calculations. Firstly it measures the airway resistance independent of lung volume sRaw and calculates to represent sGaw as the conductance of the airway independent of lung volume(10). It then simultaneously calculates to estimate airways resistance corrected for lung volume (Raw). TGV is then adjusted by the software for the volume of VT prior to occlusion that results in a value of FRCpleth. Immediately after the completion of the closed shutter panting, the subject exhaled to residual volume (RV), then performed an inspired vital capacity (IVC) to determine inspiratory capacity (IC) and total lung capacity (TLC). TLC and RV were calculated as follows:

*TLC = RV + highest IVC RV = TLC – highest VC*

In accordance with the American Thoracic Society/European Respiratory Society guidelines(11) at least 3 reproducible FRCPleth measurements were obtained with a mean value reported for all indices. A reproducibility criterion of +/- 5% from the mean value was applied to TLC and FRC values and a criterion of +/- 10 % was applied to Raw and sGaw. The two highest technically acceptable VC’s had to be within 150 mls of each other and the highest value reported to minimise the underestimation of TLC.

Erroneous manoeuvres were discarded. Quality control (QC) checks of respiratory panting loops consisted of visually inspection to ensure they were complete closed loops. Loops were required to be ±0.5Ls-1, with sRaw loops examined according to total specific resistance (sRtot)(12), where the maximum shift volumes of inspiratory and expiratory portions were used for sRaw estimation. This method of analysis was chosen due to its sensitivity to partial obstruction of the peripheral airways(13).

Gas Transfer Testing

The Vmax 22 instrument (Sensormedics Corporation, Yorba Linda CA, USA) uses carbon monoxide (CO) and methane (CH4) as the tracer gas to determine the alveolar volume (VA; volume of gas in the lung containing CO), the diffusing capacity of the lung (DLCO), which is the total uptake of CO by the lung per unit of time per unit driving pressure, and the concentration fall in alveolar CO per unit time per unit CO driving pressure (PA,CO) known as KCO. This can be calculated as DLCO/VA. Subjects wore a nose clip, formed a tight seal around the rubber mouthpiece and breathed at VT avoiding the effect of deep inspirations on the uptake of carbon monoxide (CO). The subject then performed an unforced exhalation to RV, at which point the subject’s mouthpiece was connected to the source of the test gas and the subject was asked to inhale rapidly to TLC. The inhalation had to be at least 85% of the known IVC and completed in <4.0 seconds. Subjects then held their breath, avoiding the effect of Valsalva or Muller manoeuvres, to allow gas exchange to take place. The breath hold was calculated using the Jones-Meade method and required ten seconds (+/- 2 seconds) of breath holding. Once this had been completed the subject exhaled to RV (the ‘washout’ phase). This phase requires at least an exhalation volume of 0.75-1.0L for subjects with a VC > 2.00L or at least 0.50L for those with a VC < 2.00L. At least two readings, but no more than five, were taken with four minute intervals in-between each attempt to achieve two values within 10% of the highest value and the mean reported(14).

### Six-Minute Walk Test

A 20-metre course was measured out on a flat, hard surface. A small cone was placed at each end of the course along with markers every 4 metres. 10 minutes prior to testing baseline measurements of blood pressure, pulse, O2 saturation as well as breathlessness and overall fatigue using the BORG CR-10 (Appendix 1) category ratio scale was taken whilst in a seated position. Prior use of medication was recorded and a physician then assessed all subjects for contra-indications. Absolute contraindications included unstable angina and/or myocardial infarction during the previous month. Relative contraindications include a resting heart rate of more than 120, a systolic blood pressure of more than 180 mm Hg, and a diastolic blood pressure of more than 100 mm Hg. Reasons for early termination of the test were chest pain, intolerable dyspnoea, leg cramps, diaphoresis, severe joint pain, or a pale/ashen appearance. Subjects were instructed to walk continuously back and forth along the 20 m course at their own pace, while attempting to cover as much distance as possible in 6 minutes without running or jogging. Clinical staff stood in a fixed position during testing and used scripted instructions, as per the ATS guidelines(15), to explain the test, encourage the subject and stop the test after 6 minutes. A demonstration of how to pivot around the cones was performed before testing began and a stopwatch and mechanical lap counter were used to monitor time and number of laps covered. Subjects were allowed to stop and rest during the test as required but were instructed to resume walking as soon as they felt able to do so or terminate the test where needed. After 6 minutes the subject was asked to stop and stand still whilst the distance walked was marked before sitting down whilst post exercise measurements of blood pressure, pulse, SpO2 and Borg scores were made and the distance measured. Each subject was assessed for discharge after testing by a physician.

# Additional Results

## Practicality of MBWN2

| Respiratory physiology assessment | Number of Test Sessions | | |
| --- | --- | --- | --- |
| Attempted | Valid (%) | |
| MBWN2 | 54 | 50 (93) | |
| FEV1 | 54 | 54 (100) | |
| FEF25-75 | 54 | 53 (98) | |
| FVC | 54 | 53 (98) | |
| IOS | 44 | 44 (100) |
| Pleth | 44 | 38 (86) |
| DLCO | 44 | 42 (95) |

**Table S1.** **Success rates in COPD patients for lung physiology assessments.**

Successful tests were judged according to standard internationally-agreed criteria, as described in the methods.


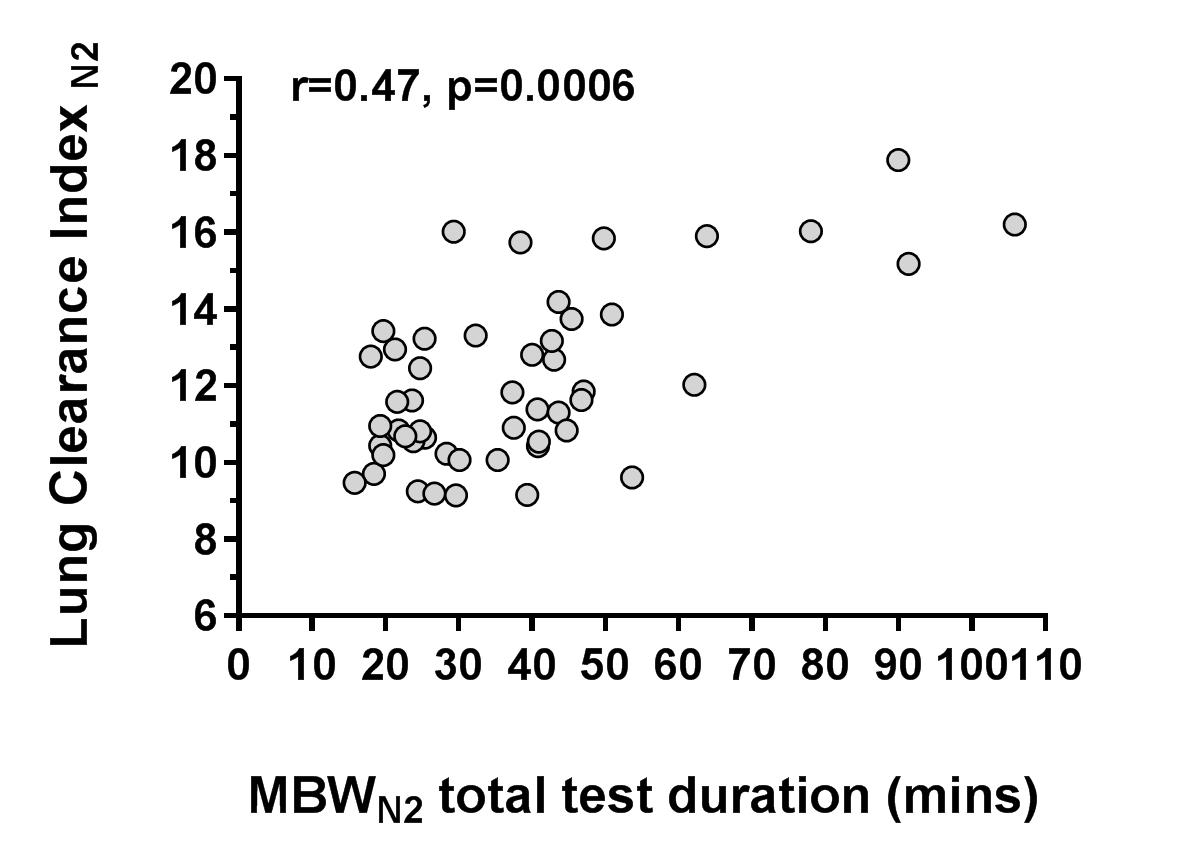


**Figure S1. Nitrogen washout (MBWN2) total test time versus Lung clearance index (LCIN2) in COPD patients.**

There was a significant positive between LCIN2 and total test duration (r= 0.47, p= 0.0006).

Reproducibility and Repeatability of MBW in COPD

**Figure S2. Bland-Altman plot of the agreement between visits of FRCN2 % predicted in COPD subjects.**

The central dotted line represents the mean difference, and the upper and lower dotted lines represent the limits of agreement (mean difference ± 2SD). The vertical line represents hyper-inflation with FRCN2>120 % predicted. The mean difference in FRCN2 % predicted was -0.4 (14.5) % across 2 visits with limits of agreement -28.9 to 28.1 %.

**Figure S3. Bland-Altman plot of the agreement between visits of LCIN2 in COPD subjects.**

The central dotted line represents the mean difference, and the upper and lower dotted lines represent the limits of agreement (mean difference ± 2 SD). The mean difference in LCIN2 was -0.10 (0.86) across 2 visits with limits of agreement -1.79 to 1.59.

Comparison of LCIN2 Z Score with lung physiology in COPD

| Physiological Assessment | Assessment Parameter | Correlation (r value) | p value |
| --- | --- | --- | --- |
| IOS | R5-R20 | 0.41 | p= 0.009* |
| X5 | -0.59 | p= 0.0006 |
| Gas Transfer | DLCO | -0.58 | p= 0.0001 |
| KCO | -0.35 | p=0.033 |
| Whole-Body Plethysmography | RV/TLC(%) | 0.40 | p= 0.017 |
| Raw | 0.55 | p=0.0006* |
| sGaw | -0.42 | p= 0.012 |
| Spirometry | FEF25-75 % | -0.60 | p<0.0001* |
| FEV1/FVC Z Score | -0.47 | p= 0.0007 |
| 6-Minute Walk | Distance (M) | -0.27 | p= 0.109* |

## Table S2. Comparison of LCIN2 with Lung Physiology and Exercise Capacity in COPD. Correlations represent Pearson correlation coefficient except *=Spearman r for non-parametric data.

**Figure S4: Correlation between LCIN2 and R5-R20.** Each point represents a single subject with previously diagnosed COPD. Markers are coloured according to GOLD stage of COPD. LCIN2 is presented as Z score, with vertical dotted line representing Z=1.65, R5-R20 are given as absolute values. Spearman rank correlation coefficient is for the entire dataset (including all 4 GOLD stages).

**Figure S5: Correlation between LCIN2 and reactance (X5).** Each point represents a single subject with previously diagnosed COPD. Markers are coloured according to GOLD stage of COPD. LCIN2 is presented as Z score, with vertical dotted line representing Z=1.65, X5 shown as absolute values. Pearson correlation coefficient is for the entire dataset (including all 4 GOLD stages).

**Figure S6:** **Correlation between LCIN2 and gas transfer (DLCO).** Each point represents a single subject with previously diagnosed COPD. Markers are coloured according to GOLD stage of COPD. LCIN2 is presented as Z score, with vertical dotted line representing Z=1.65, DLCO is shown as percent predicted with horizontal vertical line showing lower limit of normal (80%). Pearson correlation coefficient is for the entire dataset, though the single patient with GOLD stage 4 COPD was unable to complete DLCO assessment.

**Figure S7: Correlation between LCIN2 and gas trapping (RV/TLC).** Each point represents a single subject with previously diagnosed COPD. Markers are coloured according to GOLD stage of COPD. LCIN2 is presented as Z score, with vertical dotted line representing Z=1.65, RV/TLC is expressed as a percent (i.e. RV as a percentage of TLC) with horizontal vertical line showing lower limit of normal (40%)(16). Pearson correlation coefficient is for the entire dataset, though the single patient with GOLD stage 4 COPD was unable to complete plethysmography.

**Figure S8: Correlation between LCIN2 and airways resistance (Raw).** Each point represents a single subject with previously diagnosed COPD. Markers are coloured according to GOLD stage of COPD. LCIN2 is presented as Z score, with vertical dotted line representing Z=1.65, Raw is expressed as absolute measurement with horizontal vertical line showing lower limit of normal (0.3)(17). Spearman rank correlation coefficient is for the entire dataset, though the single patient with GOLD stage 4 COPD was unable to complete plethysmography.

**Figure S9: Correlation between LCIN2 and airways reactance (sGaw).** Each point represents a single subject with previously diagnosed COPD. Markers are coloured according to GOLD stage of COPD. LCIN2 is presented as Z score, with vertical dotted line representing Z=1.65, sGaw is expressed as absolute measurement. Pearson correlation coefficient is for the entire dataset, though the single patient with GOLD stage 4 COPD was unable to complete plethysmography.

**Figure S10: Correlation between LCIN2 and mid-expiratory flow (FEF25-75).** Each point represents a single subject with previously diagnosed COPD. Markers are coloured according to GOLD stage of COPD. LCIN2 is presented as Z score, with vertical dotted line representing Z=1.65, FEF25-75 is shown as percent predicted with horizontal vertical line showing lower limit of normal (80%). Spearman rank correlation coefficient is for the entire dataset, though the single patient with GOLD stage 4 COPD was unable to complete adequate FVC.

**Figure S11: Correlation between LCIN2 and distance achieved on a 6 minute walk test.** Each point represents a single subject with previously diagnosed COPD. Markers are coloured according to GOLD stage of COPD. LCIN2 is presented as Z score, with vertical dotted line representing Z=1.65, 6MWT distance is shown as absolute distance in metres (m). Spearman rank correlation coefficient is for the entire dataset, though the single patient with GOLD stage 4 COPD was unable to complete this assessment.

Comparison of lung physiology by GOLD stage

| **Parameter** | **GOLD 1** | **GOLD 2** | **GOLD 3** | **P value** |
| --- | --- | --- | --- | --- |
| **LCIN2** | 10.3 (1.2) +# (n=11) | 11.9 (1.8)*# (n=26) | 14.2 (2.3)+* (n=12) | <0.00011 |
| **LCISF6** | 10.1 (0.8) # (n=5) | 10.8 (2.3)# (n=8) | 16.0 (2.5)+* (n=4) | 0.001 |
| **R5-R20 (kPa/L/s)** | 0.08 (0.06) +# (n=9) | 0.20 (0.11)* (n=21) | 0.23 (0.09)* (n=13) | p=0.00091 |
| **X5 (kPa/L/s)** | -0.16 (0.07)# (n=9) | -0.26 (0.11)# (n=21) | -0.44 (0.13)+* (n=13) | <0.0001 |
| **DLCO %** | 75.4 (15.2)# (n=9) | 62.7 (20.2) (n=21) | 54.4 (12.0)* (n=12) | 0.03 |
| **KCO %** | 89.3 (21.3) (n=9) | 78.9 (26.0) (n=21) | 73.5 (18.2) (n=12) | ns  (0.3) |
| **RV/TLC %** | 42.5 (7.4)# (n=8) | 41.2 (6.5)# (n=19) | 58.7 (7.7)+* (n=11) | <0.0001 |
| **Raw (kPa/L/s)** | 0.25 (0.06)# (n=8) | 0.35 (0.11)# (n=19) | 0.57 (0.18)+* (n=11) | <0.0001 |
| **sGaw (L/sec/kPa/L)** | 1.07 (0.40)+# (n=8) | 0.75 (0.31)*# (n=19) | 0.34 (0.10)+* (n=11) | <0.00011 |
| **FVC%** | 115.4 (17.2)# (n=12) | 106.3 (16.0) (n=27) | 99.6 (19.7)* (n=14) | ns  (0.08) |
| **FEF25-75%** | 37.2 (10.1)+# (n=12) | 21.0 (5.8)*# (n=27) | 11.1 (2.3)+* (n=14) | <0.0001 |
| **6 Min Walk Distance (m)** | 454 (131)+  (n=7) | 346 (81)* (n=20) | 362 (48) (n=12) | 0.02 |
| **CAT Score** | 15.00 (9.07) (n=9) | 15.26 (8.24) (n=19) | 21.15 (7.23) (n=13) | ns  (0.11) |

**Table S3: Comparison of lung physiology markers by GOLD stage for patients with COPD**. Data shown are mean (standard deviation). P value is for 1 way ANOVA (or Kruskal Wallis test where one or more datasets not normally distributed) with post hoc pairwise comparisons if overall p value<0.05. *p<0.05 vs GOLD stage 1, +p<0.05 vs GOLD stage 2, #p<0.05 vs GOLD stage 3. 1=Kruskal-Wallis test.

**Figure S12. Bland-Altman plot of the agreement between FRCN2 and FRCSF6 (expressed as percent predicted) in subjects with COPD.**

The central dotted line represents the mean difference, and the upper and lower dotted lines represent the limits of agreement (mean difference ± 2 SD). There was a clear bias with mean difference of 24.4 (26.4), limits of agreement (-27.3 to 76.1) with the difference between systems appearing disproportionally greater as FRC % increased.

**References**

1. Jensen R, Stanojevic S, Gibney K, Salazar JG, Gustafsson P, Subbarao P, et al. Multiple breath nitrogen washout: a feasible alternative to mass spectrometry. PLoS One.8(2):e56868.

2. Horsley AR, Gustafsson PM, Macleod KA, Saunders C, Greening AP, Porteous DJ, et al. Lung clearance index is a sensitive, repeatable and practical measure of airways disease in adults with cystic fibrosis. Thorax. 2008;63(2):135-40.

3. Hannon D, Bradley JM, Bradbury I, Bell N, Elborn JS, O'Neill K. Shortened Lung Clearance Index is a repeatable and sensitive test in children and adults with cystic fibrosis. BMJ open respiratory research.1(1):e000031.

4. Pillow JJ, Stocks J, Sly PD, Hantos Z. Partitioning of airway and parenchymal mechanics in unsedated newborn infants. Pediatric research. 2005;58(6):1210-5.

5. Oostveen E, MacLeod D, Lorino H, Farre R, Hantos Z, Desager K, et al. The forced oscillation technique in clinical practice: methodology, recommendations and future developments. The European respiratory journal. 2003;22(6):1026-41.

6. Miller MR, Hankinson J, Brusasco V, Burgos F, Casaburi R, Coates A, et al. Standardisation of spirometry. European Respiratory Journal. 2005;26(2):319-38.

7. Quanjer PH, Stanojevic S, Cole TJ, Baur X, Hall GL, Culver BH, et al. Multi-ethnic reference values for spirometry for the 3-95-yr age range: the global lung function 2012 equations. The European respiratory journal. 2012;40(6):1324-43.

8. Vogelmeier CF, Criner GJ, Martinez FJ, Anzueto A, Barnes PJ, Bourbeau J, et al. Global Strategy for the Diagnosis, Management, and Prevention of Chronic Obstructive Lung Disease 2017 Report. GOLD Executive Summary. Am J Respir Crit Care Med. 2017;195(5):557-82.

9. Criee CP, Sorichter S, Smith HJ, Kardos P, Merget R, Heise D, et al. Body plethysmography--its principles and clinical use. Respiratory medicine. 2011;105(7):959-71.

10. Topalovic M, Derom E, Osadnik CR, Troosters T, Decramer M, Janssens W. Airways resistance and specific conductance for the diagnosis of obstructive airways diseases. Respiratory research. 2015;16:88.

11. Wanger J, Clausen JL, Coates A, Pedersen OF, Brusasco V, Burgos F, et al. Standardisation of the measurement of lung volumes. European Respiratory Journal. 2005;26(3):511-22.

12. Islam MS, Ulmer WT. Diagnostic value of "closing volume" in comparison to "airway resistance-lung volume plot". Respiration. 1974;31(6):449-58.

13. Goldman MD, Smith HJ, Ulmer WT. Whole-Body Plethysmography. European Respiratory Society Monograph. 312005. p. 15-43.

14. Macintyre N, Crapo RO, Viegi G, Johnson DC, van der Grinten CP, Brusasco V, et al. Standardisation of the single-breath determination of carbon monoxide uptake in the lung. European Respiratory Journal. 2005;26(4):720-35.

15. Crapo RO, Enright PL, Zeballos RJ. ATS statement: guidelines for the six-minute walk test. Am J Respir Crit Care Med. 2002;166(1):111-7.

16. Herranz AD. Rv/Tlc-Percent Ratio - Alternative Criteria of Normality. European Respiratory Journal. 1995;8(10):1812-3.

17. Quanjer PH. Standardized Lung-Function Testing. B Eur Physiopath Res. 1983;19:1-92.
